# Supplementary material for: Expression of myogenes in longissimus dorsi muscle during prenatal development in commercial and local Piau pigs
Source: PubMed Central journal article supplement (PMC5127148; doi:10.1590/1678-4685-gmb-2015-0295), 2016-10-31
Supplement: 1415-4757-gmb-1678-4685-GMB-2015-0295-Suppl01.pdf [file 1415-4757-gmb-1678-4685-GMB-2015-0295-Suppl01.pdf]

**Table S1** - Amplification efficiencies for target and reference genes.

|              | Gene            | Temperature (°C) | Primer concentration (nM) | Quantity of cDNA (ng) | Amplification efficiency |
|--------------|-----------------|------------------|---------------------------|-----------------------|--------------------------|
| Target genes | CHD8            | 61               | 100                       | 25                    | 0.95                     |
|              | CSRP3           | 60               | 200                       | 71                    | 0.89                     |
|              | EID2B           | 60               | 200                       | 25                    | 0.88                     |
|              | HIF1AN          | 60               | 100                       | 25                    | 0.88                     |
|              | IKBKB           | 61               | 200                       | 25                    | 0.99                     |
|              | LEF1            | 60               | 200                       | 75                    | 0.99                     |
|              | MAP2K1          | 60               | 200                       | 75                    | 0.99                     |
|              | MRAS            | 60               | 200                       | 25                    | 0.81                     |
|              | MYOG            | 61               | 100                       | 25                    | 0.93                     |
|              | RBM24           | 61               | 100                       | 25                    | 0.99                     |
|              | RSPO3           | 60               | 100                       | 75                    | 1.00                     |
|              | SOX7            | 61               | 200                       | 225                   | 0.82                     |
|              | SUFU            | 60               | 200                       | 75                    | 0.91                     |
|              | Reference genes | ACTB             | 61                        | 100                   | 75                       |
| GAPDH        |                 | 60               | 100                       | 75                    | 0.88                     |
|              |                 | 61               | 100                       | 75                    | 0.95                     |
| HPRT1        |                 | 60               | 100                       | 75                    | 1.00                     |
